# Supplementary material for: A Meta-Analysis on Dual Protocols for Chronic Stroke Motor Recovery: Robotic Training and tDCS
Source: MDPI journal article supplement (doi:10.3390/app13031992), 2023-02-03
Supplement: s1 [file s1]

Archive with 2 entries (2 files):
- PRISMA_Jan 09 2023.pdf
- Supplementary Files_Feb 2 2023.pdf
