# Supplementary material for: A Meta-Analysis on Dual Protocols for Chronic Stroke Motor Recovery: Robotic Training and tDCS
Source: MDPI journal article supplement (doi:10.3390/app13031992), 2023-02-03
Supplement: s1 [file s1]

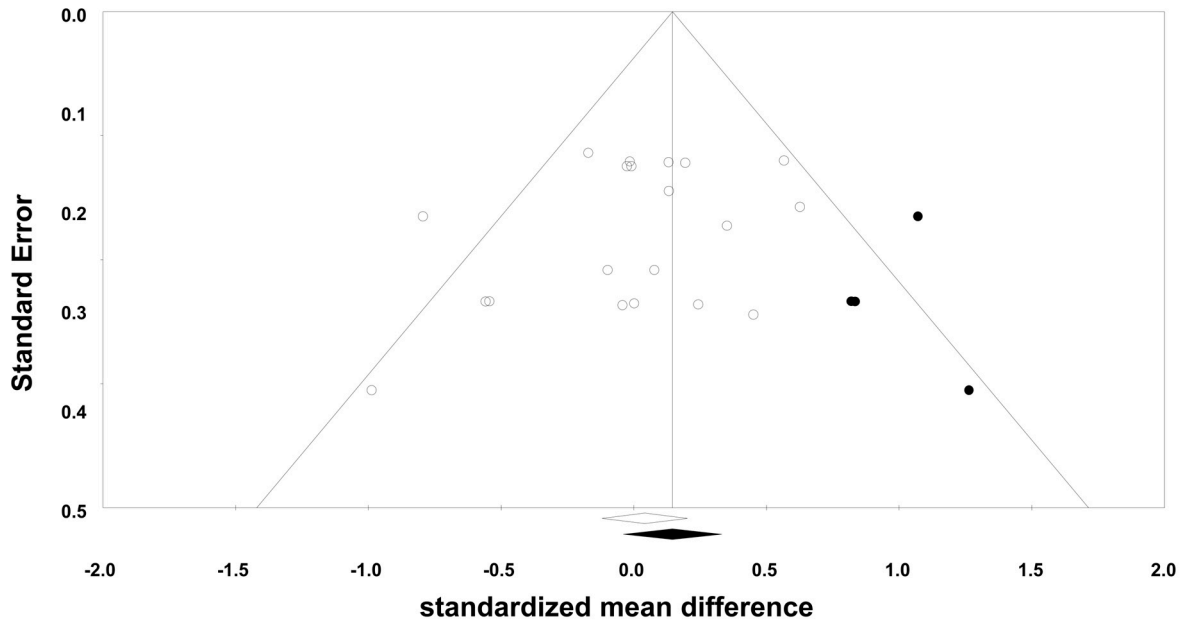

**Figure S1. Funnel plots including 20 comparisons about short-term effects of combined robotic-training and tDCS protocols on upper limb for publication bias assessments.** White circles and white diamond display the original comparisons and overall effects size, whereas four black circles and black diamond indicate denote imputed comparisons and revised effect size.

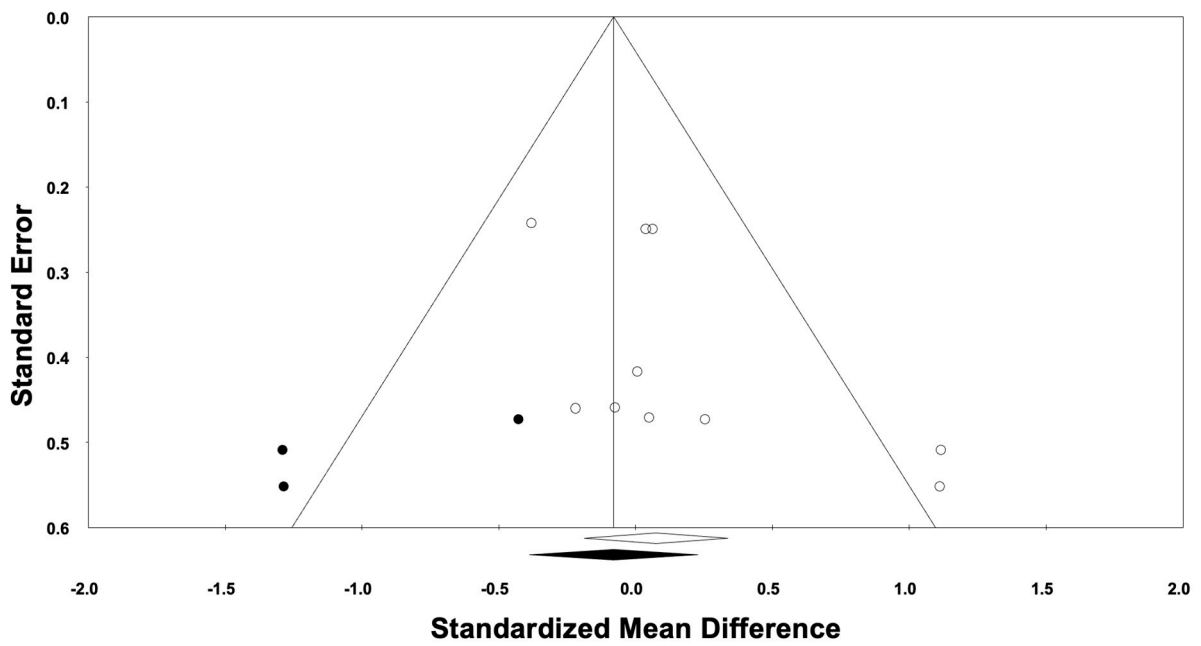

**Figure S2. Funnel plots including 10 comparisons about long-term effects of combined robotic-training and tDCS protocols on upper limb for publication bias assessments.** White circles and white diamond display the original comparisons and overall effects size, whereas three black circles and black diamond indicate denote imputed comparisons and revised effect size.

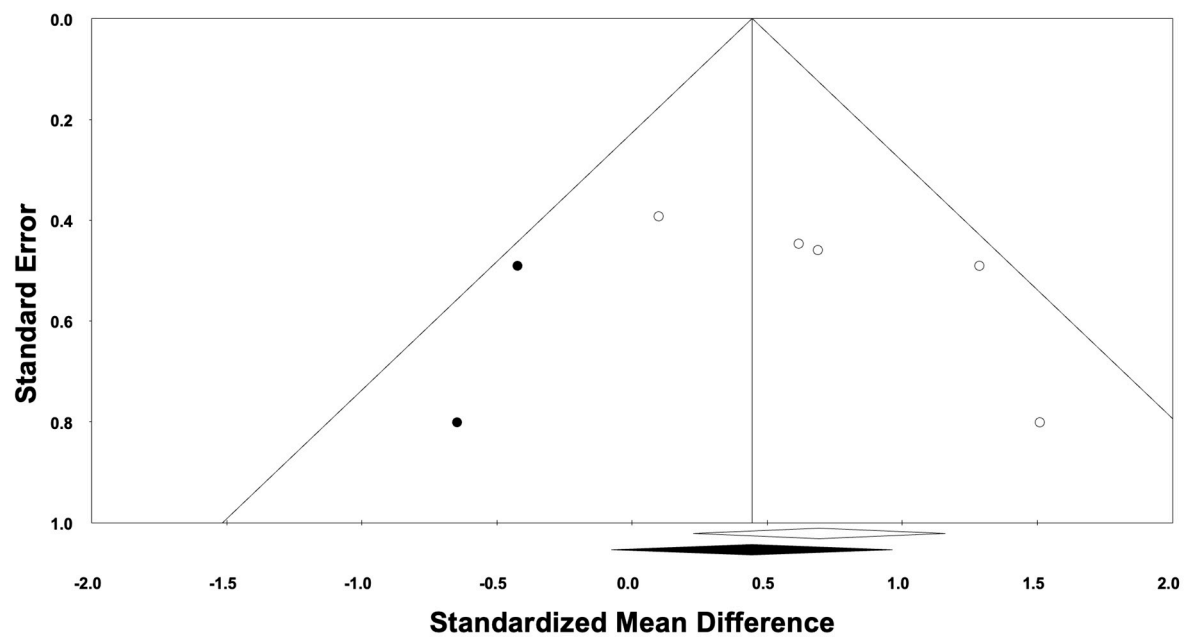

**Figure S3. Funnel plots including five comparisons about short-term effects of combined robotic-training and tDCS protocols on lower limb for publication bias assessments.** White circles and white diamond display the original comparisons and overall effects size, whereas two black circles and black diamond indicate denote imputed comparisons and revised effect size.

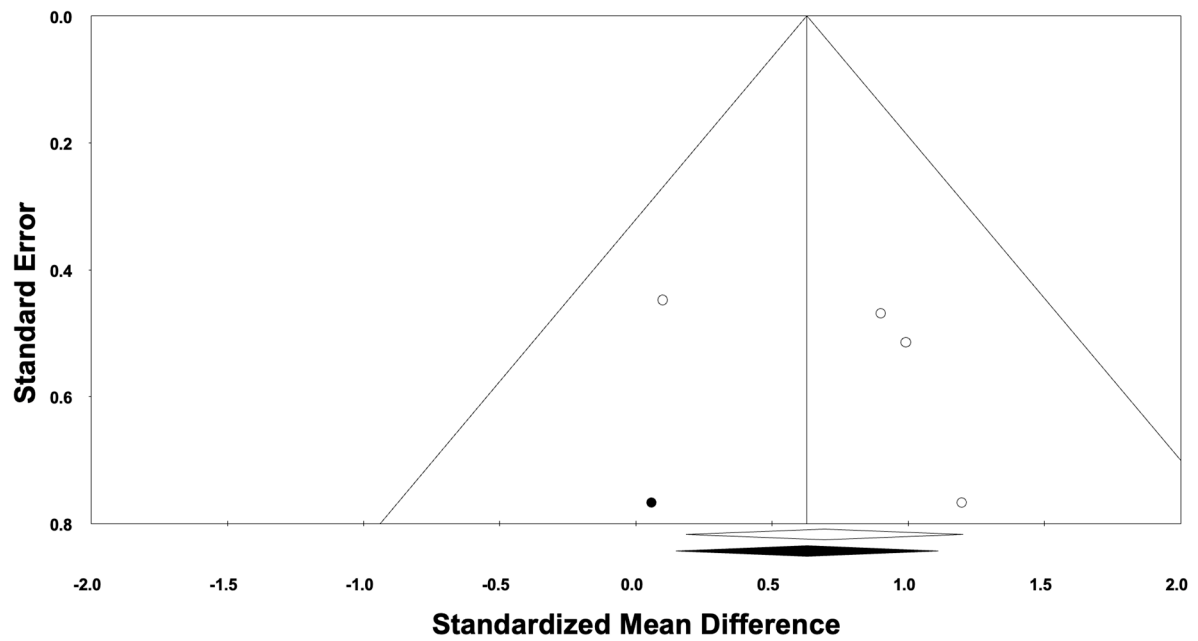

**Figure S4. Funnel plots including four comparisons about long-term effects of combined robotic-training and tDCS protocols on lower limb for publication bias assessments.** White circles and white diamond display the original comparisons and overall effects size, whereas one black circle and black diamond indicate denote imputed comparisons and revised effect size.

**Table S1. Intervention protocols for control**

| Study                                   | Robotic-Training             | Joints              | Support Type                | Session | Sham Current |
|-----------------------------------------|------------------------------|---------------------|-----------------------------|---------|--------------|
| <b><i>Upper Limb Rehabilitation</i></b> |                              |                     |                             |         |              |
| Ang 2015 [51]                           | MI-BCI/MIT-Manus             | Uni: shoulder/elbow | End-effector                | 10      | 30 sec       |
| Chew 2020 [52]                          | MI-BCI/MIT-Manus             | Uni: shoulder/elbow | End-effector                | 10      | 20 sec       |
| De Laet 2022 [54]                       | REApplan robot               | Uni: wrist/hand     | End-effector                | 1       | 8 sec        |
| Dehem 2018 [55]                         | REApplan robot               | Uni: shoulder/elbow | End-effector                | 1       | 40 sec       |
| Edwards 2019 [56]                       | MIT-Manus                    | Uni: whole arm      | End-effector                | 36      | 30 sec       |
| Giacobbe 2013 [58]                      | InMotion3 wrist robot        | Uni: wrist/hand     | End-effector                | 1       | 30 sec       |
| Hesse 2011 [59]                         | Bi-Manu Track                | Bi: wrist/hand      | End-effector                | 30      | No sham      |
| Hong 2017 [60]                          | MI-BCI/MIT-Manus             | Uni: shoulder/elbow | End-effector                | 10      | No sham      |
| Hu 2021 [66]                            | MI-BCI/MIT-Manus             | Uni: shoulder/elbow | End-effector                | 10      | No sham      |
| Kasashima 2015 [45]                     | MI-BCI/Motor-driven orthosis | Uni: finger         | End-effector                | 30      | No sham      |
| Mazzoleni 2015 [62]                     | InMotion3 wrist robot        | Uni: wrist/hand     | End-effector                | 16      | 5 sec        |
| Mazzoleni 2019 [63]                     | InMotion3 wrist robot        | Uni: wrist/hand     | End-effector                | 30      | No sham      |
| Maxfield-Panker 2011 [61]               | ReoGo robotic device         | Uni: shoulder/elbow | End-effector                | 22      | No sham      |
| Straudi 2016 [65]                       | ReoGo robotic device         | Uni: shoulder/elbow | End-effector                | 10      | 30 sec       |
| Triccas 2015 [46]                       | Armeo® Spring arm robot      | Uni: whole arm      | Exoskeleton                 | 18      | 10 sec       |
| <b><i>Lower Limb Rehabilitation</i></b> |                              |                     |                             |         |              |
| Danzl 2013 [53]                         | Lokomat                      | Bi: whole leg       | Exoskeleton                 | 12      | 75 sec       |
| Geroïn 2011 [57]                        | Gait Trainer GT1             | Bi: whole leg       | End-effector                | 10      | No sham      |
| Leon 2017 [47]                          | Gait Trainer or Lokomat      | Bi: whole leg       | End-effector or Exoskeleton | 20      | No sham      |
| Picelli 2015 [37]                       | G-EO System Evolution        | Bi: whole leg       | End-effector                | 10      | 2 min        |
| Seo 2017 [64]                           | Walkbot S-WALKBOT            | Bi: whole leg       | Exoskeleton                 | 10      | 1 min        |

*Abbreviations.* MI-BCI: Motor Imagery Brain-Computer Interface.

**Table S2. Specific data format and meta-analytic calculation data**

| Study                                                      | Data Format                         | SMD    | SE    | Variance | 95%CI-LL | 95%CI-UL | Z-value | p-value |
|------------------------------------------------------------|-------------------------------------|--------|-------|----------|----------|----------|---------|---------|
| <b><i>Upper Limb Rehabilitation: Short-Term Effect</i></b> |                                     |        |       |          |          |          |         |         |
| Ang 2015 [51]                                              | Independent groups (Sample size, p) | -0.556 | 0.468 | 0.219    | -1.473   | 0.362    | -1.187  | 0.235   |
| Chew 2020 [52]                                             | Independent groups (means, SD's)    | -0.542 | 0.468 | 0.219    | -1.459   | 0.375    | -1.158  | 0.247   |
| De Laet 2022 [54]                                          | Paired groups (N, p-value)          | 0.106  | 0.244 | 0.059    | -0.372   | 0.583    | 0.434   | 0.664   |
| Dehem 2018 [55]                                            | Paired groups (N, p-value)          | 0.568  | 0.241 | 0.058    | 0.096    | 1.040    | 2.357   | 0.018   |
| Edwards 2019 [56]                                          | Independent groups (means, p)       | -0.169 | 0.229 | 0.052    | -0.617   | 0.278    | -0.741  | 0.458   |
| Giacobbe 2013 [58]                                         | Paired groups (N, p-value)          | 0.629  | 0.316 | 0.100    | 0.010    | 1.248    | 1.991   | 0.047   |
| Giacobbe 2013 [58]                                         | Paired groups (N, p-value)          | -0.793 | 0.331 | 0.110    | -1.442   | -0.144   | -2.396  | 0.017   |
| Giacobbe 2013 [58]                                         | Paired groups (N, p-value)          | 0.135  | 0.290 | 0.084    | -0.434   | 0.703    | 0.464   | 0.642   |
| Hesse 2011 [59]                                            | Independent groups (means, SD's)    | -0.007 | 0.250 | 0.063    | -0.497   | 0.483    | -0.027  | 0.978   |
| Hesse 2011 [59]                                            | Independent groups (means, SD's)    | -0.023 | 0.250 | 0.063    | -0.513   | 0.467    | -0.093  | 0.926   |
| Hong 2017 [60]                                             | Independent groups (means, SD's)    | 0.004  | 0.471 | 0.222    | -0.920   | 0.928    | 0.009   | 0.993   |
| Hu 2021 [66]                                               | Independent groups (means, SD's)    | -0.040 | 0.474 | 0.225    | -0.970   | 0.890    | -0.085  | 0.932   |
| Kasashima 2015 [45]                                        | Independent groups (means, SD's)    | 0.454  | 0.489 | 0.239    | -0.506   | 1.413    | 0.927   | 0.354   |
| Mazzoleni 2015 [62]                                        | Independent groups (means, SD's)    | -0.985 | 0.611 | 0.374    | -2.184   | 0.213    | -1.612  | 0.107   |
| Mazzoleni 2019 [63]                                        | Independent groups (Sample size, p) | 0.354  | 0.346 | 0.120    | -0.325   | 1.032    | 1.021   | 0.307   |
| Maxfield-Panker 2011 [61]                                  | Independent groups (means, SD's)    | 0.245  | 0.473 | 0.224    | -0.683   | 1.172    | 0.517   | 0.605   |
| Straudi 2016 [65]                                          | Independent groups (Sample size, p) | -0.096 | 0.418 | 0.174    | -0.915   | 0.722    | -0.230  | 0.818   |
| Triccas 2015 [46]                                          | Independent groups (means, SD's)    | 0.080  | 0.418 | 0.174    | -0.739   | 0.898    | 0.191   | 0.848   |
| <b>Overall</b>                                             |                                     | 0.040  | 0.078 | 0.006    | -0.113   | 0.192    | 0.508   | 0.611   |
| <b><i>Lower Limb Rehabilitation</i></b>                    |                                     |        |       |          |          |          |         |         |
| Danzl 2013 [53]                                            | Independent groups (means, SD's)    | 1.511  | 0.802 | 0.643    | -0.061   | 3.082    | 1.884   | 0.060   |
| Geroiin 2011 [57]                                          | Independent groups (Sample size, p) | 0.690  | 0.460 | 0.212    | -0.212   | 1.593    | 1.500   | 0.134   |
| Leon 2017 [47]                                             | Independent groups (Sample size, p) | 0.100  | 0.393 | 0.155    | -0.671   | 0.872    | 0.255   | 0.798   |
| Picelli 2015 [37]                                          | Independent groups (Sample size, p) | 1.287  | 0.491 | 0.241    | 0.324    | 2.250    | 2.620   | 0.009   |
| Seo 2017 [64]                                              | Independent groups (Sample size, p) | 0.619  | 0.447 | 0.200    | -0.258   | 1.495    | 1.383   | 0.167   |
| <b>Overall</b>                                             |                                     | 0.693  | 0.237 | 0.056    | 0.228    | 1.157    | 2.924   | 0.003   |

*Abbreviations.* CI: confidence interval; ES: effect size; LL: lower limit; S: single effect size (not combined); SE: standard error; SD: standard deviation; SMD: standardized mean difference; UL: upper limit.

**Table S2. Specific data format and meta-analytic calculation data (continued)**

| Study                                                     | Data Format                         | SMD    | SE    | Variance | 95%CI-LL | 95%CI-UL | Z-value | p-value |
|-----------------------------------------------------------|-------------------------------------|--------|-------|----------|----------|----------|---------|---------|
| <b><i>Upper Limb Rehabilitation: Long-Term Effect</i></b> |                                     |        |       |          |          |          |         |         |
| Ang 2015 [51]                                             | Independent groups (Sample size, p) | -0.074 | 0.460 | 0.211    | -0.975   | 0.827    | -0.161  | 0.872   |
| Chew 2020 [52]                                            | Independent groups (means, SD's)    | -0.218 | 0.461 | 0.212    | -1.121   | 0.686    | -0.472  | 0.637   |
| Edwards 2019 [56]                                         | Independent groups (means, p)       | -0.379 | 0.243 | 0.059    | -0.855   | 0.097    | -1.561  | 0.119   |
| Hesse 2011 [59]                                           | Independent groups (means, SD's)    | 0.040  | 0.250 | 0.063    | -0.451   | 0.530    | 0.158   | 0.874   |
| Hesse 2011 [59]                                           | Independent groups (means, SD's)    | 0.063  | 0.250 | 0.063    | -0.427   | 0.553    | 0.252   | 0.801   |
| Hong 2017 [60]                                            | Independent groups (means, SD's)    | 0.255  | 0.473 | 0.224    | -0.673   | 1.182    | 0.538   | 0.591   |
| Hu 2021 [66]                                              | Independent groups (means, SD's)    | 1.116  | 0.510 | 0.260    | 0.118    | 2.115    | 2.191   | 0.028   |
| Kasashima 2015 [45]                                       | Independent groups (means, SD's)    | 1.113  | 0.553 | 0.305    | 0.030    | 2.197    | 2.015   | 0.044   |
| Maxfield-Panker 2011 [61]                                 | Independent groups (means, SD's)    | 0.051  | 0.471 | 0.222    | -0.873   | 0.975    | 0.108   | 0.914   |
| Triccas 2015 [46]                                         | Independent groups (means, SD's)    | 0.008  | 0.417 | 0.174    | -0.810   | 0.826    | 0.020   | 0.984   |
| <b>Overall</b>                                            |                                     | 0.075  | 0.134 | 0.018    | -0.188   | 0.338    | 0.559   | 0.576   |
| <b><i>Lower Limb Rehabilitation</i></b>                   |                                     |        |       |          |          |          |         |         |
| Danzl 2013 [53]                                           | Independent groups (means, SD's)    | 1.197  | 0.768 | 0.590    | -0.308   | 2.702    | 1.559   | 0.119   |
| Geroiin 2011 [57]                                         | Independent groups (Sample size, p) | 0.901  | 0.469 | 0.220    | -0.018   | 1.821    | 0.921   | 0.055   |
| Picelli 2015 [37]                                         | Independent groups (means, SD's)    | 0.100  | 0.449 | 0.201    | -0.779   | 0.979    | 0.223   | 0.824   |
| Seo 2017 [64]                                             | Independent groups (Sample size, p) | 0.993  | 0.515 | 0.256    | -0.016   | 2.002    | 1.928   | 0.054   |
| <b>Overall</b>                                            |                                     | 0.692  | 0.258 | 0.067    | 0.186    | 1.198    | 2.678   | 0.007   |

*Abbreviations.* CI: confidence interval; ES: effect size; LL: lower limit; S: single effect size (not combined); SE: standard error; SD: standard deviation; SMD: standardized mean difference; UL: upper limit.
